# Supplementary material
Source: Royal Society of Chemistry journal article supplement (doi:10.1039/d6qm00060f)
Supplement: d6qm00060f1.pdf [file d6qm00060f1.pdf]

## Supporting information

### Oxygen Vacancies Regulation in Ag-decorated CeO<sub>2</sub> Hollow Multishelled Structure for-Bacterial Elimination and Oxidative Stress Alleviation

Lingling Shang,<sup>a, b</sup> Jinmiao Sun,<sup>d</sup> Ludan Zhang,<sup>d</sup> Decai Zhao,<sup>\*a</sup> Jing Xiong,<sup>a, b</sup> Jiawei Wan,<sup>a</sup> Yuguang Wang<sup>\*d</sup>, Dan Wang<sup>\*c</sup>

---

<sup>a</sup> State Key Laboratory of Biopharmaceutical Preparation and Delivery, Institute of Process Engineering, Chinese Academy of Sciences, 1 North 2nd Street, Zhongguancun, Beijing 100190, China. Email: [dczhao@ipe.ac.cn](mailto:dczhao@ipe.ac.cn)

<sup>b</sup> University of Chinese Academy of Sciences, 19A Yuquan Road, Beijing 100049, China

<sup>c</sup> School of Chemistry and Environmental Engineering, Shenzhen University, 1066 Xueyuan Avenue, Nanshan District, Shenzhen 518055, China. Email: [danwang@szu.edu.cn](mailto:danwang@szu.edu.cn)

<sup>d</sup> Department of General Dentistry II, Peking University School and Hospital of Stomatology, National Clinical Research Center for Oral Diseases, National Engineering Laboratory for Digital and Material Technology of Stomatology, 22 Zhongguancun South Avenue, Beijing 100081, China. Email: [wangyuguang@bjmu.edu.cn](mailto:wangyuguang@bjmu.edu.cn)

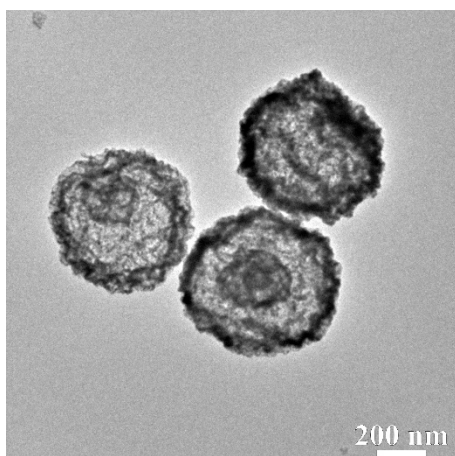

Figure S1. TEM images of CeO<sub>2</sub> HoMS.

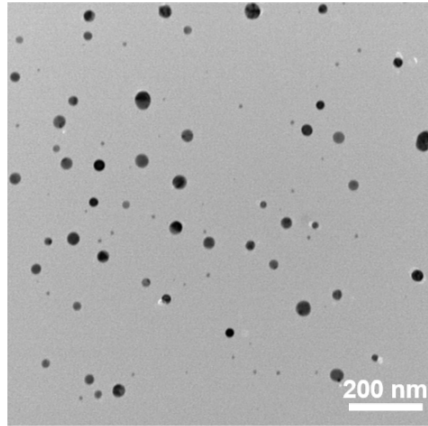

Figure S2. TEM images of AgNPs.

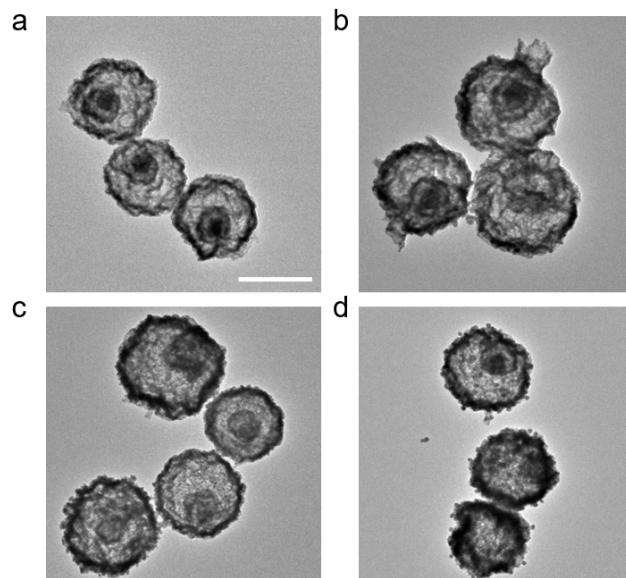

Figure S3. TEM images of (a) CeO<sub>2</sub> HoMS, (b) Ce HoMS/Ag<sub>1</sub>, (c) Ce HoMS/Ag<sub>2</sub>, and (d) Ce HoMS/Ag<sub>3</sub>. Scale bars: 200 nm.

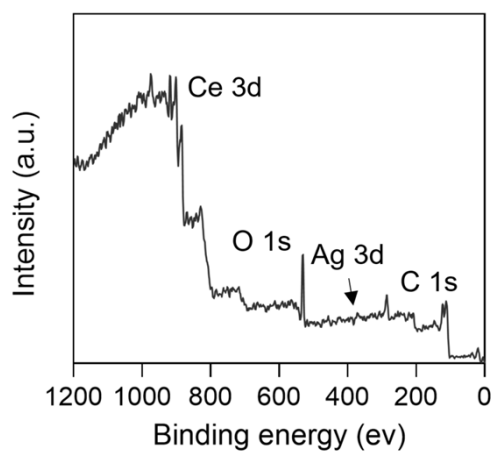

Figure S4. X-ray photoelectron spectroscopy (XPS) survey spectrum of Ce HoMS/Ag.

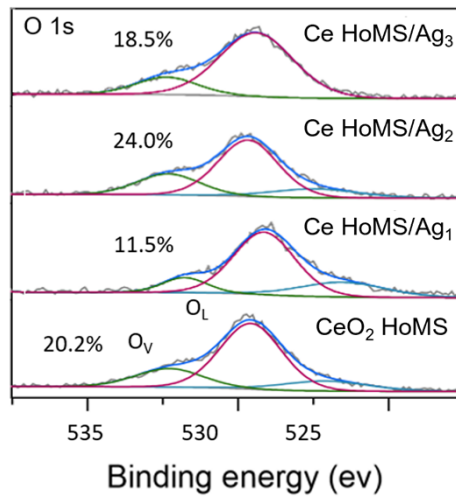

Figure S5. O<sub>v</sub> concentration in CeO<sub>2</sub> HoMS, Ce HoMS/Ag<sub>1</sub>, Ce HoMS/Ag<sub>2</sub>, and Ce HoMS/Ag<sub>3</sub> from XPS O 1s spectra.

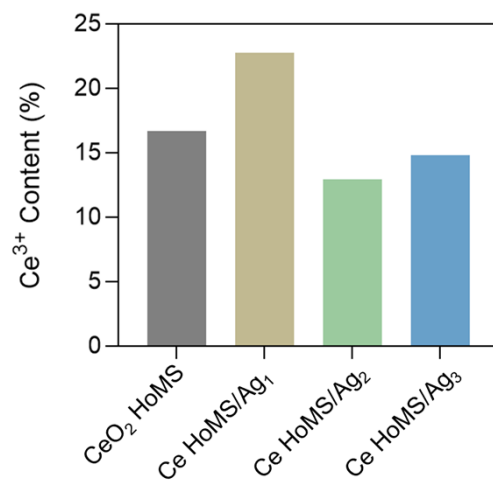

Figure S6. Ce<sup>3+</sup> content in CeO<sub>2</sub> HoMS, Ce HoMS/Ag<sub>1</sub>, Ce HoMS/Ag<sub>2</sub>, and Ce HoMS/Ag<sub>3</sub> determined from XPS Ce 3d spectra.

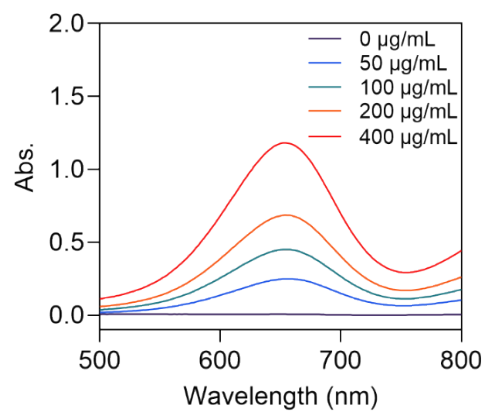

Figure S7. POD-like activity of CeO<sub>2</sub> HoMS nanozyme, assessed by the formation of oxidized TMB (TMB<sup>+</sup>) in the presence of H<sub>2</sub>O<sub>2</sub>, measured by UV-vis absorption spectroscopy.

Table R1 Kinetic parameters of CAT-like activities of CeO<sub>2</sub> HoMS, Ce HoMS/Ag<sub>1</sub>, Ce HoMS/Ag<sub>2</sub>, and Ce HoMS/Ag<sub>3</sub>.

|                         | Vmax ( $\mu\text{M min}^{-1}$ ) | Km ( $\mu\text{M}$ ) |
|-------------------------|---------------------------------|----------------------|
| CeO <sub>2</sub> HoMS   | 5.163                           | 2.612                |
| Ce HoMS/Ag <sub>1</sub> | 4.623                           | 5.624                |
| Ce HoMS/Ag <sub>2</sub> | 4.139                           | 7.354                |
| Ce HoMS/Ag <sub>3</sub> | 5.546                           | 5.497                |
